# Supplementary material
Source: ML conference proceedings conference paper supplement (https://openaccess.thecvf.com/content/ICCV_2019/html/Siam_AMP_Adaptive_Masked_ICCV_2019_paper.html)
Supplement: Supplementary file 1 [file Siam_AMP_Adaptive_Masked_ICCV_2019_supplemental.pdf]

Archive with 3 entries (2 files):
- 4105-supp/
- 4105-supp/4105-supp.pdf
- 4105-supp/4015-vid-supp.mp4
