# Supplementary material
Source: ML conference proceedings conference paper supplement (https://openaccess.thecvf.com/content/ICCV_2019/html/Siam_AMP_Adaptive_Masked_ICCV_2019_paper.html)
Supplement: Supplementary file 1 [file Siam_AMP_Adaptive_Masked_ICCV_2019_supplemental.pdf › 4105-supp/4105-supp.pdf]

# AMP: Adaptive Masked Proxies for Few-Shot Segmentation

## Supplementary Material

Mennatullah Siam  
University of Alberta  
mennatul@ualberta.ca

Boris Oreshkin  
Element AI  
boris@elementai.com

Martin Jagersand  
University of Alberta

### 1. N-way K-shot Segmentation

Experiments conducted on PASCAL-5<sup>i</sup> similar to Shaban et. al. [7] setup evaluate 1-way segmentation with the new class as the foreground to be predicted. We conduct further experiments on Labelled Faces in the Wild (LFW) dataset [5] to perform 2-way segmentation. The dataset provides images for labelled faces annotated with parts which include 2 semantic part classes. We compare against initializing the weights of the convolutional layer responsible for classification randomly, and with naive fine-tuning on the random weights. Evaluation is performed on the 1-shot and 5-shot cases as shown in Table 1. Our proposed method outperforms the naive finetuning baseline with a significant margin of 24.6% and 23.4% in the 1-shot case and 5-shot case respectively. Performing fine-tuning with our masked proxies scheme leads to a boost in the mIoU with 3.0% in the 1-shot and 4.4% in the 5-shot. The flexibility of the proposed few-shot method allows its coupling with back-propagation which proves to be useful in the parts segmentation. Nonetheless, using the masked proxies solely without fine-tuning outperforms naive fine-tuning with randomly initialized weights. Figure 1 shows qualitative evaluation on LFW dataset for the 1-shot 2-way segmentation scenario.

Table 1: Quantative results on LFW [5] segmentation dataset. Rnd: Indicates the use of random weights in the final layer. MP: indicates imprinting the final layer weights using the masked proxies. FT: indicates fine-tuning.

| Method   | 1-Shot      | 5-shot      |
|----------|-------------|-------------|
| Rnd      | 15.0        | -           |
| MP       | 48.4        | 53.8        |
| Rnd + FT | 20.4        | 27.5        |
| MP + FT  | <b>50.2</b> | <b>58.7</b> |

### 2. Iterative Adaptation

Iterative refinement based on the pseudo-labels from the query image is conducted to improve the segmentation accuracy. The use of the initial masked proxies based on the support set provides an initial class signature that can segment the query image. In order to improve the segmentation accuracy we use the pseudo-labels based on the initial probability map for the query. An iterative adaptation is performed to the background class weights while imprinting the new class weights based on the masked proxies. The iterative refinement module boosts the results further by 3% in the 1-shot case for the mean on all folds as shown in Table 2.

Table 2: Quantative results on PASCAL-5<sup>i</sup> segmentation dataset 1-shot scenario. AMP: Without iterative adaptation. Iterative-AMP: The iterative adaptation performed on the query.

| Method        | AMP  | Iterative-AMP |
|---------------|------|---------------|
| <b>Fold 0</b> | 36.2 | 41.9          |
| <b>Fold 1</b> | 49.0 | 50.2          |
| <b>Fold 2</b> | 43.9 | 46.7          |
| <b>Fold 3</b> | 33.3 | 34.7          |
| <b>Mean</b>   | 40.6 | 43.4          |

### 3. Multi-resolution Imprinting

In this section we further explain the multi-resolution imprinting method applied to the original FCN8s architecture. Since we replace pooling layers with dilated convolution to increase the receptive field and maintain the resolution. Our multi-resolution imprinting scheme in this architecture utilizes input from different dilation factors of 1, 2, and 4 respectively. The output feature maps are convolved by our masked proxies to produce the final heat maps. The heatmaps from different resolution are further combined using summation to provide the output probability map. Figure 2 shows the multi-resolution imprinting performed on

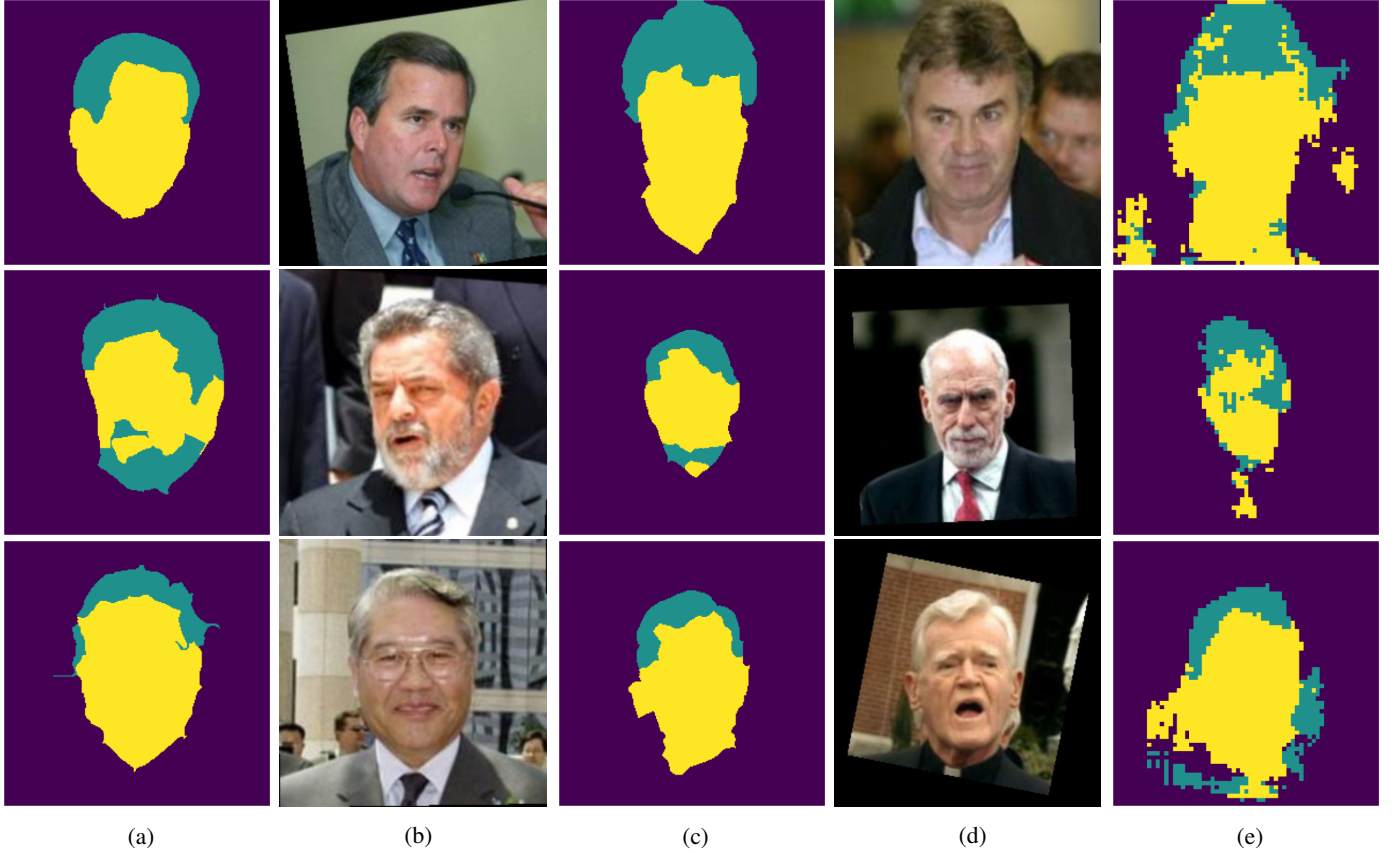

Figure 1: Output predictions on LFW dataset [5] using our proposed method without fine-tuning. (a,b) support set label-image pair. (c,d) query label-image pair. (e) our prediction.

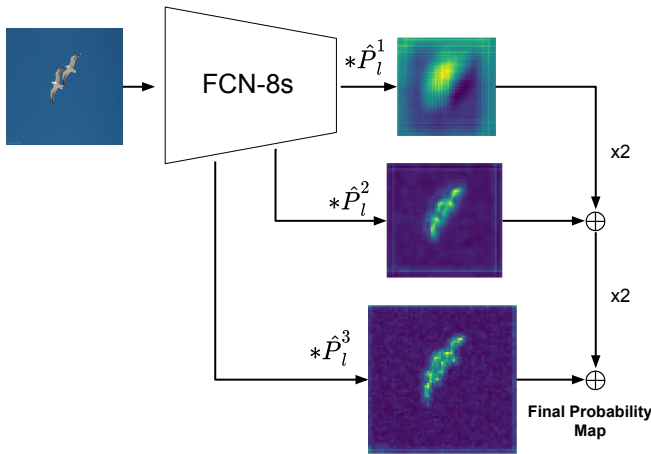

Figure 2: Multi-resolution Imprinting of Dilated-FCN8s architecture.

the FCN8s architecture.

## 4. Video Object Segmentation

In this section we elaborate on the online adaptation experiments that were conducted for video object segmentation. Our base 2-stream wide Resnet model included dilated convolution at the final layers to incorporate contextual information. However the last convolutional layer that is being imprinted had a high dilation rate of factor 12. Such high dilation rate proved to be problematic to adaptively imprint the weights for both foreground and background classes. Figure 3 shows the effect of dilation rate on the output feature maps. When the output feature maps are masked with the label, it clearly shows that high dilation rate can lead to incorporating features from the main object of interest in the background class. One solution would be to use dilation factor 1 in the final classification layer. However our experiments show that lower dilation rate would degrade the performance of the segmentation network by 5%. Therefore, masked proxies were used to adaptively imprint the foreground class only in the model with dilation rate 12, in order not to corrupt the background class.

We further conducted experiments on DAVIS-17 [6] with

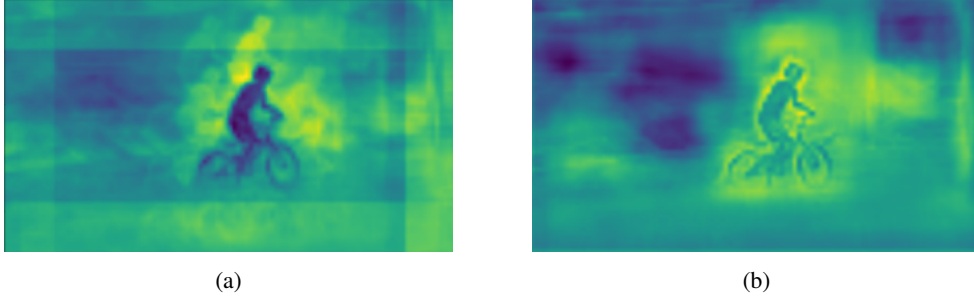

Figure 3: Effect of Dilation Rate on one of the Feature maps used as input to the masked average pooling procedure. (a) Dilation Rate of 12. (b) Dilation Rate of 1.

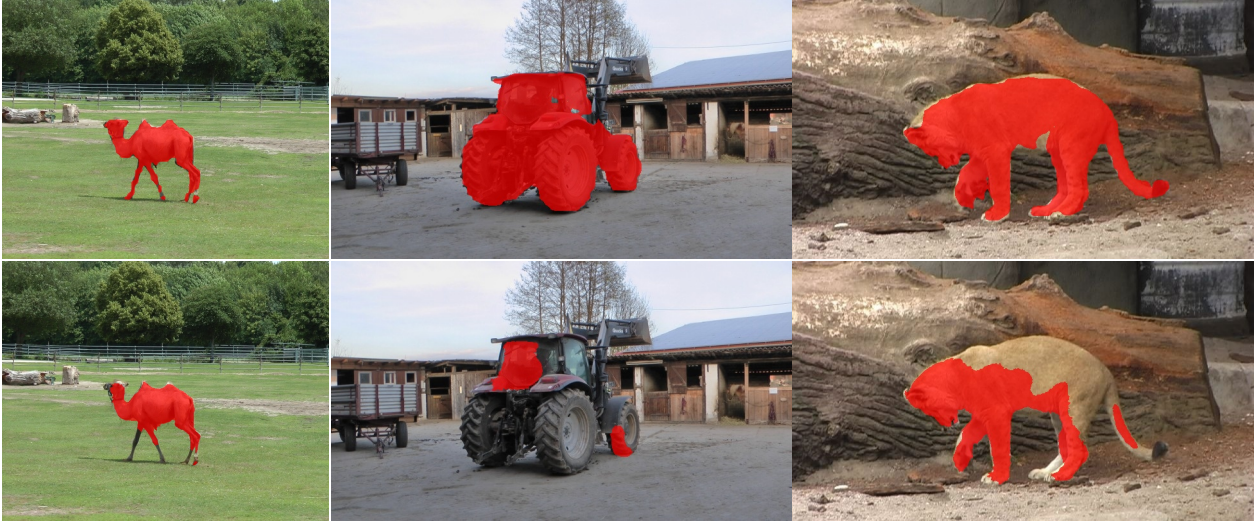

Figure 4: Qualitative Analysis on FBMS dataset. Top: AMP (ours). Bottom: LVO [9].

multiple objects to evaluate instance mask propagation. Since our base network was mainly designed for single object segmentation, we rather used Mask R-CNN [2] as our base network for multiple objects segmentation. Where the masked proxy for each instance is imprinted and used to label further track instances. It signifies the flexibility of our method to work with different architectures. Table 3 shows the results for our proposed masked proxies. Although we have only used the masked proxies in the ROI Align in order to imprint the fully connected layers responsible for classification solely. Further improvement gains can be achieved by adaptively imprinting the mask prediction layers as well, which is left for our future work. The baselines we have reported are from the recently published work by Wang et. al. [13]. Since our method does not train on DAVIS-2017 training set we compare against the methods that are not fully supervised as reported in [13]. Our method operates in an end-to-end manner without post-processing steps that other methods would need to handle multiple objects. Yet it outperforms the video colorization method that was based

Table 3: Quantitative Analysis on DAVIS-17 [6]

| Method                  | F-mean      |
|-------------------------|-------------|
| Identity                | 23.6        |
| FlowNet2 [3]            | 25.2        |
| Transitive Inv [12]     | 26.8        |
| Deep Cluster [1]        | 33.2        |
| Video Colorization [11] | 32.7        |
| Cycle Consistency [13]  | <b>39.8</b> |
| Ours                    | <b>33.4</b> |

on 3D ResNet [11], and the self supervised method in transitive invariance work [12].

We show qualitative analysis on DAVIS and FBMS datasets, as they were not included in the main manuscript due to space constraints. Figure 4 shows our results on FBMS in comparison to LVO [10]. Figure 5 shows our results on DAVIS without post processing in comparison to other unsupervised video object segmentation methods. It

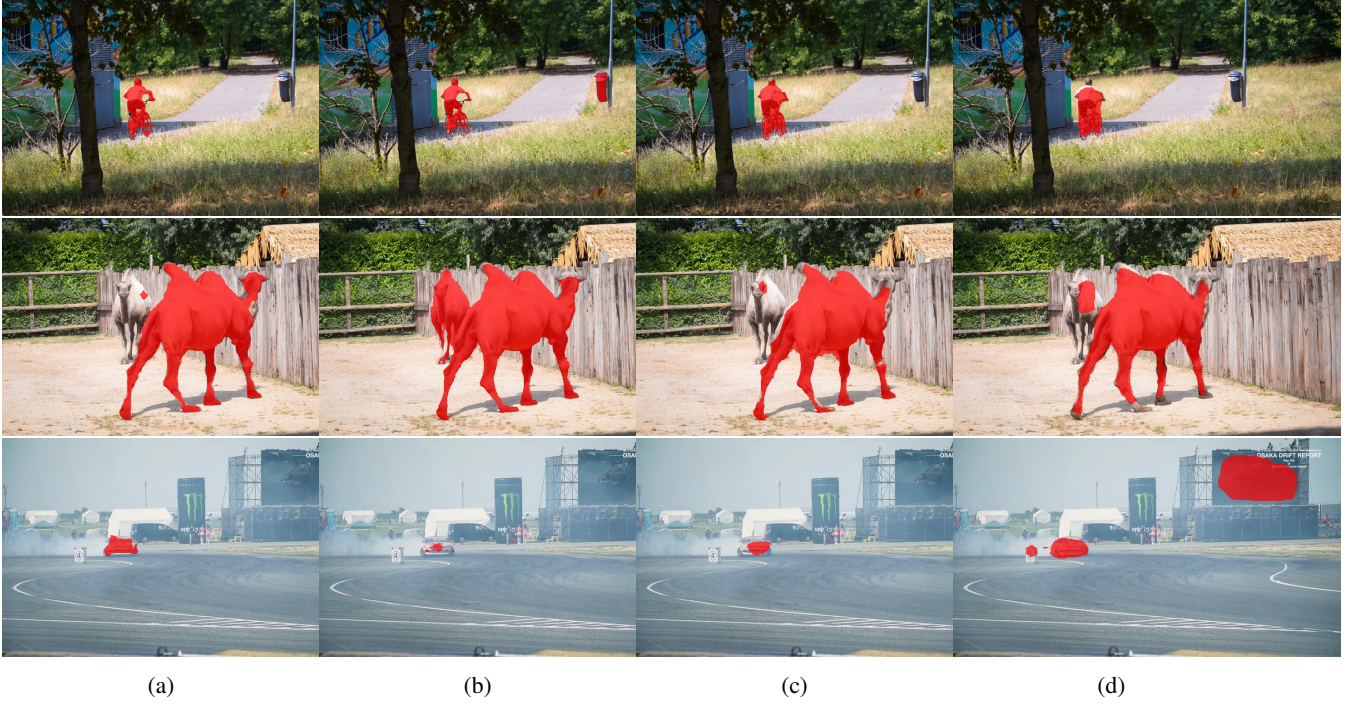

Figure 5: Qualitative Analysis on DAVIS dataset. (a) AMP (ours). (b) MotAdapt [8]. (c) LVO [9]. (d) FSeg [4].

shows qualitatively how our method outperforms the state of the art on both datasets.

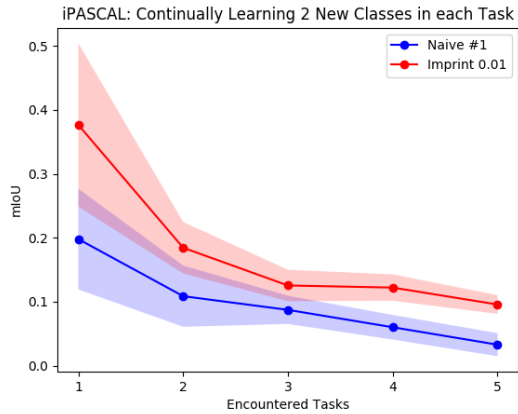

Figure 6: Plotting standard deviation as shaded area for 5 multiple runs.

## 5. iPASCAL Experiments

Finally for iPASCAL experiments the main manuscript reported the averaged mIoU over multiple runs but without explicitly showing the variation among the different runs. Fig. 6 shows the standard deviation shaded for the best performing AMP and the baseline. It ensures on the benefit

added from the use of our adaptive method.

## References

- [1] Mathilde Caron, Piotr Bojanowski, Armand Joulin, and Matthijs Douze. Deep clustering for unsupervised learning of visual features. In *Proceedings of the European Conference on Computer Vision (ECCV)*, pages 132–149, 2018.
- [2] Kaiming He, Georgia Gkioxari, Piotr Dollár, and Ross Girshick. Mask r-cnn. In *Proceedings of the IEEE international conference on computer vision*, pages 2961–2969, 2017.
- [3] Eddy Ilg, Nikolaus Mayer, Tommo Saikia, Margret Keuper, Alexey Dosovitskiy, and Thomas Brox. Flownet 2.0: Evolution of optical flow estimation with deep networks. In *Proceedings of the IEEE Conference on Computer Vision and Pattern Recognition*, pages 2462–2470, 2017.
- [4] Suyog Dutt Jain, Bo Xiong, and Kristen Grauman. Fusionseg: Learning to combine motion and appearance for fully automatic segmentation of generic objects in videos. *arXiv preprint arXiv:1701.05384*, 2017.
- [5] Andrew Kae, Kihyuk Sohn, Honglak Lee, and Erik Learned-Miller. Augmenting CRFs with Boltzmann machine shape priors for image labeling. 2013.
- [6] Jordi Pont-Tuset, Federico Perazzi, Sergi Caelles, Pablo Arbeláez, Alex Sorkine-Hornung, and Luc Van Gool. The 2017 davis challenge on video object segmentation. *arXiv preprint arXiv:1704.00675*, 2017.
- [7] Amirreza Shaban, Shray Bansal, Zhen Liu, Irfan Essa, and Byron Boots. One-shot learning for semantic segmentation. *arXiv preprint arXiv:1709.03410*, 2017.

- [8] Mennatullah Siam, Chen Jiang, Steven Lu, Laura Petrich, Mahmoud Gamal, Mohamed Elhoseiny, and Martin Jagersand. Video segmentation using teacher-student adaptation in a human robot interaction (hri) setting. *arXiv preprint arXiv:1810.07733*, 2018.
- [9] Pavel Tokmakov, Karteek Alahari, and Cordelia Schmid. Learning video object segmentation with visual memory. *arXiv preprint arXiv:1704.05737*, 2017.
- [10] Paul Voigtlaender and Bastian Leibe. Online adaptation of convolutional neural networks for video object segmentation. *arXiv preprint arXiv:1706.09364*, 2017.
- [11] Carl Vondrick, Abhinav Shrivastava, Alireza Fathi, Sergio Guadarrama, and Kevin Murphy. Tracking emerges by colorizing videos. In *Proceedings of the European Conference on Computer Vision (ECCV)*, pages 391–408, 2018.
- [12] Xiaolong Wang, Kaiming He, and Abhinav Gupta. Transitive invariance for self-supervised visual representation learning. In *Proceedings of the IEEE International Conference on Computer Vision*, pages 1329–1338, 2017.
- [13] Xiaolong Wang, Allan Jabri, and Alexei A Efros. Learning correspondence from the cycle-consistency of time. *arXiv preprint arXiv:1903.07593*, 2019.
